# Supplementary material for: A genomics dissection of Kenya’s COVID-19 waves: temporal lineage replacements and dominance of imported variants of concern
Source: Research Square preprint supplement (doi:10.21203/rs.3.rs-942627/v1), 2021-10-18
Supplement: Supplementary file 1 [file fc4b16aced60b142b8d8c748.docx]

Supplementary Table 1

| Pangolin Lineages (Commonly found Countries) | Wave 1 | Wave 2 | Wave 3 |
| --- | --- | --- | --- |
| B.1 (European) | 67 | 45 | 5 |
| B.1.1 (European) | 27 |  | 1 |
| A.25 (Uganda/KY) | 8 |  |  |
| B.1.243 (USA) | 3 |  |  |
| B.1.549 (Kenya) | 2 | 10 |  |
| B.1.446 (USA) | 2 | 2 |  |
| B.1.393 (Uganda) | 2 |  |  |
| C.11 (Chile) | 2 |  |  |
| B.1.397 (USA) | 1 |  |  |
| B.1.511 (USA) | 1 |  |  |
| B.1.166 (USA) | 1 |  |  |
| B.1.1.33 (Brazil) | 1 |  |  |
| A (Root/China) | 1 |  |  |
| B.1.612 (USA) | 1 |  |  |
| B.1.36.10 (Jordan/Saudi Arabia/USA) | 1 |  |  |
| B.1.530 (Kenya) |  | 8 | 1 |
| B.1.596.1 (Kenya) |  | 5 |  |
| A.23.1 (Global) |  | 3 | 10 |
| B.1.1.254 (South Africa) |  | 2 |  |
| A.23 (Uganda) |  | 2 |  |
| B.1.428 (Denmark) |  | 1 |  |
| N.8 (Kenya) |  | 1 |  |
| B.1.384 (USA) |  | 1 |  |
| B.1.1.7 (UK) |  |  | 167 |
| B.1.617.2 (India) |  |  | 57 |
| B.1.525 (Global) |  |  | 21 |
| B.1.351 (South Africa) |  |  | 12 |
| B.1.1.301 (UK) |  |  | 2 |
| B.1.221 (European) |  |  | 1 |
| B.1.466.1 (USA/UAE) |  |  | 1 |
| B.1.466 (Global) |  |  | 1 |
| B.1.551 (USA) |  |  | 1 |
| B.4.4 (USA) |  |  | 1 |
| B.1.36.16 (SE Asia) |  |  | 1 |
| B.1.367 (European) |  |  | 1 |
| **Total lineages in wave 2** | **120** | **80** | **283** |
